# 1 Metagenomic evidence for co-occurrence of antibiotic, biocide and 2 metal resistance genes in pigs

3 Xuanji Li<sup>a</sup>, Christopher Rensing<sup>b</sup>, Gisle Vestergaard<sup>c</sup>, Joseph Nesme<sup>a</sup>, Shashank Gupta<sup>a</sup>, Manimozhiyan  
4 Arumugam<sup>d</sup>, Asker Daniel Brejnrod<sup>e\*</sup>, Søren Johannes Sørensen<sup>a\*</sup>.

5  
6 **Affiliation:** <sup>a</sup>Department of Biology, Section of Microbiology, University of Copenhagen, 2100  
7 Copenhagen, Denmark; <sup>b</sup>Institute of Environmental Microbiology, College of Resources and  
8 Environment, Fujian Agriculture & Forestry University, Fuzhou 350002, China; <sup>c</sup>Technical University of  
9 Denmark, Section of Bioinformatics, Department of Health Technology, 2800 Kgs. Lyngby, Denmark;  
10 <sup>d</sup>Novo Nordisk Foundation Center for Basic Metabolic Research, University of Copenhagen,  
11 Copenhagen, Denmark. <sup>e</sup>Skaggs School of Pharmacy, University of California San Diego, La Jolla, United  
12 States.

13 **\*Corresponding author:** Asker Daniel Brejnrod & Søren J. Sørensen, Universitetsparken 15, bldg. 1,  
14 DK2100 Copenhagen, telephone: +45 51 82 70 07, Fax: +45 35 32 20 40, e-mail: [sjs@bio.ku.dk](mailto:sjs@bio.ku.dk)

15  
16  
17  
18  
19  
20  
21  
22  
23

## 24 **Highlights**

- 25 • A comprehensive gut microbiome metagenomics analysis of 278 pigs
- 26 • Co-selection phenomena were investigated via co-occurrence patterns as a proxy
- 27 • Twenty-seven types of co-occurrences involving 131 resistance genes were detected
- 28 • Regardless of use of antibiotics, AMR can be maintained by co-occurrence with MRGs/BRGs
- 29 • Maintenance of AMR is not a random selection process but pertains to specific phylogenetic clades

30

## 31 **Abstract**

32 Antibiotic-resistant pathogens constitute an escalating public health concern. Hence a better  
33 understanding of the underlying processes responsible for this expansion is urgently needed. Co-selection  
34 of heavy metals/biocides and antibiotic resistance genes (ARGs) has been suggested as one potential  
35 mechanism promoting the proliferation of antimicrobial resistance (AMR). This paper aims to elucidate  
36 this interplay and exploit differences in antibiotic usage to infer patterns of co-selection by the non-  
37 antibiotic factors metals and biocides in the context of pig farming. We examined 278 gut metagenomes  
38 from pigs with continuous antibiotic exposure, only at weaning and at no exposure. Metals as growth  
39 promoters and biocides as disinfectants are currently used with little restrictions in stock farming. The  
40 pigs under continuous antibiotic exposure displayed the highest co-occurrence of ARGs and other  
41 genetic elements while the pigs under limited use of antibiotics still showed abundant co-occurrences.  
42 Pathogens belonging to *Enterobacteriaceae* displayed increased co-occurrence phenomena, suggesting that  
43 this maintenance is not a random selection process from a mobilized pool but pertains to specific  
44 phylogenetic clades. These results suggest that metals and biocides displayed strong selective pressures  
45 on ARGs exerted by intensive farming, regardless of the current use of antibiotics.

46

## 47 **Keywords**

48 Antibiotic resistance; co-selection; biocide; metal; mobile genetic element; Horizontal gene transfer

49

## 50 **Introduction**

51 Antimicrobial resistance in pathogenic bacteria constitutes a considerable public health concern (Baker-  
52 Austin et al., 2006). Despite making tremendous efforts to restrict usage of several key antibiotics  
53 worldwide, AMR can frequently be found in different environments (B. Li et al., 2015; Rodriguez-Mozaz  
54 et al., 2015). To control the potential threat from AMR spread, it is necessary to investigate the underlying  
55 processes responsible for this expansion.

56

57 Generally, the occurrence of AMR is largely driven by the selection pressure of antibiotics (Goossens et  
58 al., 2005). Besides that, other agents such as antibacterial biocides and heavy metals can help to maintain  
59 AMR via co-selection (Ashbolt et al., 2013; Hartmann et al., 2016; Mazhar et al., 2021). The co-selection  
60 of ARGs and metal resistance genes (MRGs) has been commonly observed in contaminated soil (Song  
61 et al., 2017), water (Icgen and Yilmaz, 2014), and industrial environments (Mazhar et al., 2021;  
62 Stepanauskas et al., 2005) with enriched metals. Some literature has demonstrated that ARGs had a  
63 stronger correlation to some metals than to their corresponding antibiotics (Ji et al., 2012). Unlike  
64 antibiotics, metals can constitute a long-term selection pressure due to metals not being degradable  
65 (Stepanauskas et al., 2005), which can bring stability to the ARG pool in both engineered and natural  
66 systems. Compared to metals, biocides have received less attention as a potential co-selection agent.  
67 Biocide substances have been employed for centuries as disinfectants for medical equipment and as  
68 preservatives in pharmaceuticals, cosmetics and food (SCENIHR, 2009), especially biocides with limited  
69 toxicity to animals such as quaternary ammonium compounds (QACs), biguanides and bisphenols  
70 (Grande Burgos et al., 2013). However, some research has suggested excessive use of QACs increased  
71 bacterial tolerance to antibiotics (Buffet-Bataillon et al., 2012; Tandukar et al., 2013). Metals and biocides  
72 can co-select for antibiotic-resistant bacteria by several mechanisms (Chapman, 2003): resistance genes

73 are physically located on the same genetic element (co-resistance); the same gene confers resistance to  
74 both antibiotics and biocide/metal (cross-resistance); biocide resistance genes (BRGs)/MRGs share the  
75 same regulatory mechanism with ARGs (co-regulation).

76

77 The concurrent transfer of ARGs and BRGs/MRGs via mobile genetic elements (MGEs) is another  
78 challenging public health problem, which has aggravated the persistence and spread of ARGs (Benveniste  
79 and Davies, 1973). So far, research on the co-transfer of these three genetic determinants has been limited,  
80 although there are plenty of opportunities for this to occur. Stock farming is one such potential hot spot  
81 for the dissemination of combinations of ARGs, BRGs/MRGs, and MGEs due to the widespread use  
82 of antibiotics, heavy metals and biocides in food feed (Clark, 2004). Antibiotics and metals (especially  
83 zinc and copper) are commonly used as growth promoters in stock farming (Gaskins et al., 2002).  
84 However, the use of antibiotics as growth promoter has been banned in the European Union since 2006  
85 (Lekagul et al., 2019) and therefore farmers have given more attention to alternatives such as copper and  
86 zinc (Jensen et al., 2016). This has resulted in the accumulation of these metals in soils where pig slurry  
87 was applied. In contrast, China does not prohibit the use of antibiotics as growth promoter (Lekagul et  
88 al., 2019) in stock farming and at the same time, the extensive use of heavy metals in feed in China has  
89 greatly increased over the last couple of decades (Wang et al., 2013). Many of the plants used for livestock  
90 are dependent on biocides to control weeds, insects and diseases (Clark, 2004) and biocides are also used  
91 for disinfection of animal housing facilities (Montfoort JA, Poel P van der, n.d.). However, investigations  
92 on the co-selection of heavy metals/biocides and antibiotics used in animal farms, which are closely  
93 connected to human health, are still scarce (Seiler and Berendonk, 2012), especially under various  
94 exposure levels of antibiotics.

95

96 Genome sequencing has often complemented analysis of phenotypic outcomes (Song et al., 2017;  
97 Stepanauskas et al., 2006) to clarify the genetic determinants of resistance, and indeed large-scale efforts

98 have investigated repositories of publicly available genomic data and established the co-presence of both  
99 metal- and antibiotic-resistance (Li et al., 2017; Pal et al., 2015). These repositories are comprehensive,  
100 but the information about the origins of the sequenced isolates varies, making it difficult to infer that  
101 genes of interest are present in the underlying populations as a whole. In this study, we attempted to  
102 make use of publicly available metagenomics data of 278 pigs in the different farms from three countries  
103 (Xiao et al., 2016). The antibiotic usage patterns in these pigs have been well-characterized. The pigs in  
104 French farms were fed organically and pigs in Danish farms received antibiotics only at weaning, while  
105 pigs in the Chinese farm were continuously fed on antibiotics. Metals and biocides were used in all farms.  
106 We hypothesized that the use of metals and biocides would exert strong selective pressures on ARGs in  
107 intensive farming regardless of antibiotic use.

108

## 109 **Methods**

### 110 **Sample information, data collection and pre-processing**

111 Table S1 illustrates the antibiotic exposure on 278 pigs in different farms (Xiao et al., 2016). Seventy-  
112 eight pigs in the Chinese farm were continuously exposed to various antibiotics, while one hundred pigs  
113 in Danish farms were only exposed at weaning. One hundred pigs in French farms were raised completely  
114 organic, although a subset of them was raised on farms with previous use of antibiotics.

115

116 The clean Illumina Hiseq paired reads of 278 pig gut metagenomes, which have removed adaptor  
117 contamination, low-quality reads and pig genomic DNA, were retrieved at  
118 <https://www.ebi.ac.uk/ena/data/view/PRJEB11755> from European Bioinformatics Institute (EBI).  
119 Assembly of contigs was done with megahit (version 1.1.3) with default options (D. Li et al., 2015). Any  
120 contigs shorter than 500bp were filtered out. The prediction of open reading frame (ORF) in the contigs  
121 was performed with prodigal (version 2.6.2) in META mode (Hyatt et al., 2010).

122

## 123 **ARG, BRG, MRG, and MGE prediction**

124 The antibacterial biocide and metal resistance genes database (BacMet, version 2.0) was used for the  
125 predictions of BRG and MRG (Pal et al., 2014): the amino acid sequences of predicted ORFs were  
126 subjected to similarity searches against the BacMet database with diamond search in the more sensitive  
127 mode and k1 option (Buchfink et al., 2014). Only BRGs and MRGs with at least 90% identity and a  
128 maximum e-value of  $1 \times 10^{-3}$  were retained. The comprehensive Antibiotic Resistance Database (CARD  
129 database, version 3.0.0) was used to detect ARGs: the amino acid sequences of predicted ORFs were  
130 aligned with the CARD database through RGI identifier with diamond as aligner (Jia et al., 2017). Only  
131 ARGs with “Strict” or “Perfect” significance cut-off were preserved for further analysis. MGE homologs  
132 were characterized using PFAM (Finn et al., 2016) and TnpPred (Riadi et al., 2012) databases through  
133 HMMER v3.1b2, with an e-value of  $1 \times 10^{-5}$  as a threshold (Sáenz et al., 2019). If the predicted ORF had  
134 more than one hit for MGE homologs, the hit with the lowest e-value was retained. In the present study,  
135 MGEs were classified into 9 categories according to functions: conjugative transposon,  
136 integrase/integrase-related, phage integrase, recombinase, resolvase, RteC (related to tetracycline  
137 conjugative transposon), transposase/transposase-related, transposition related, transposon breakage  
138 related.

139

## 140 **Gene coverage/abundance calculation**

141 Clean reads were aligned against the reference ORF nucleotides with BWA aligner (Li, 2013). The  
142 alignment summary statistics were calculated using Samtools idxstats (Li et al., 2009). For the  
143 comparisons of gene coverage/abundance between samples, GCPM (Gene Coverage Per Million) value  
144 was used to normalize the mapped reads for sequencing depth and gene length. The formula is GCPM

145 
$$GCPM(t) = \frac{(\text{counts}(t)/\text{gene length}(t)) \times 10^6}{\sum_i^n \text{counts}_i / \text{gene length}_i}$$
 where GCPM (t) is the GCPM value of gene t, counts (t) is the number of

146 mapped reads to the gene ( $t$ ), gene length ( $l$ ) is the length of gene ( $t$ ),  $n$  is the number of all the predicted  
147 ORFs.

148

## 149 **Statistical analysis and R application**

150 All statistical analysis and data sorting in the study were done in R (R Development Core Team, 2011).  
151 Between-individual diversity ( $\beta$ -diversity) of gene coverage/abundance was evaluated by Bray-Curtis  
152 dissimilarity matrices through R function “vegdist” in the package “vegan” (Oksanen et al., 2008).  $\beta$ -  
153 diversity matrices were ordinated by PCoA plot (R function “plot\_ordination” in R package “phyloseq”)  
154 (McMurdie and Holmes, 2013). Permutation multivariate analysis of variance (PERMANOVA) was used  
155 to compare the differences in  $\beta$ -diversity between groups when FDR correction was required (R function  
156 “pairwise.adonis” in R) (Arbizu, 2017). Within-individual diversity ( $\alpha$ -diversity) was measured by  
157 observed richness of gene coverage/abundance. One-way ANOVA (R package “stats”) was used to  
158 compare the differences in  $\alpha$ -diversity among groups. TukeyHSD test (R package “stats”) was used to do  
159 pairwise comparisons of  $\alpha$ -diversity. The pairwise comparison of gene abundance between three groups  
160 was done using the Wilcoxon rank sum test (R function “pairwise.wilcox.test”). Venn diagram was  
161 plotted using R function “draw.triple.venn” in R package “VennDiagram” (Chen and Boutros, 2011).  
162 Fisher’s exact test was used to test the statistical significance of the number of contigs between groups  
163 (R function “fisher.test” in R package “stats”).

164

## 165 **Co-occurrence analysis**

166 The resistance genes located in the same assembled contig were considered as co-occurring. Co-  
167 occurrence was considered trustable if the same association was present in at least two different contigs.

168

## 169 **Contig source screening**

170 Fifteen million contigs from 138,683 bacterial genomes in the NCBI Reference Sequence Database  
171 (RefSeq) were downloaded (19.12.2018) and the downloaded bacterial genomes were indexed to generate  
172 a BLAST database with makeblastdb. Blastn (version 2.6.0) was used to search for the contigs carrying  
173 ARGs, MGEs, BRGs/MRGs detected in the study from the reference genomes. A minimal blast  
174 similarity of 95%, a shortest alignment length of 10kb and a biggest e-value of 10e-10 were used to filter  
175 blast hits. R function “heat\_tree” in “metacoder” package (Foster et al., 2017) was used to plot the  
176 taxonomic tree to visualize the bacterial contig source. The tree branch represents the affiliation relation  
177 between taxa.

178

## 179 **Results**

### 180 **Gut microbiome of pigs in the Chinese farm contained the highest abundance of resistance** 181 **genes**

182 The total loads of BRGs, MRGs, and potentially mobile ARGs (ARGs found together with MGEs in  
183 one contig) varied significantly between different farms (Fig. 1A). When looking at all resistance  
184 determinants, the gut microbiome of pigs in the Chinese farm carried the highest load (Pairwise Wilcoxon  
185 rank-sum test, FDR-adjusted; Pigs in Danish, French and Chinese farms were represented by D, F and  
186 C, respectively. Mobile ARG: C vs D,  $P < 2e-16$ ; C vs F,  $P < 2e-16$ ; D vs F,  $P < 2e-16$ . BRG: C vs D,  $P$   
187 =  $4.2e-14$ ; C vs F,  $P = 4.5e-10$ ; D vs F,  $P = 0.53$ . MRG: C vs D,  $P = 5.2e-14$ ; C vs F,  $P = 3.0e-07$ ; D vs  
188 F,  $P = 0.027$ . MGE: C vs D,  $P < 2e-16$ ; C vs F,  $P = 0.073$ ; D vs F,  $P < 2e-16$ ). The pigs in Danish farms  
189 had the second-highest abundance of mobile ARGs and similar abundance of BRG to the pigs in French  
190 farms. The pigs in French farms had the second-highest abundance of MRGs. Notably, only 10 of 100  
191 pigs in French farms had mobile ARGs in their gut microbiome, though the total abundance of MGEs  
192 in French pigs was similar to Chinese pigs.

193



194 We calculated observed richness for each resistance determinant in different farms (Fig. 1B). For each  
195 gene type, pigs in the Chinese farm were found to have a higher diversity followed by the pigs in Danish  
196 farms (TukeyHSD test; Mobile ARG: C vs D,  $P < 1e-07$ ; C vs F,  $P < 1e-07$ ; D vs F,  $P < 1e-07$ . BRG: C  
197 vs D,  $P < 1e-07$ ; C vs F,  $P < 1e-07$ ; D vs F,  $P = 0.11$ . MRG: C vs D,  $P < 1e-07$ ; C vs F,  $P < 1e-07$ ; D vs  
198 F,  $P = 0.08$ . MGEs: C vs D,  $P = 2.34e-05$ ; C vs F,  $P < 1e-07$ ; D vs F,  $P = 8.28e-05$ ). However, pigs in  
199 French farms had similar BRG and MRG diversity compared to pigs in Danish farms.

200

201 In general, mobile ARGs, BRGs, MRGs and MGEs had a pronounced separation in composition based  
202 on farms (Fig. 1C) (pairwise Adonis test, FDR-adjusted; Mobile ARG/BRG/MRG/MGE: C vs D,  $P =$   
203  $0.003$ ; C vs F,  $P = 0.003$ ; D vs F,  $P = 0.003$ ). All detected ORFs conferred resistance to 20 metals, 36  
204 biocides, 34 antibiotics, and encoded 9 types of mobile genetic elements. Fig. 1D shows the most  
205 abundant genes conferring resistance to 13 metals, 14 biocides, and 10 antibiotics. Overall, of the MRGs  
206 detected, genes conferring Zn and Cu resistance were the most abundant. Among BRGs, genes encoding  
207 resistance to QACs were the most abundant. When we investigated the potentially mobile fraction of the  
208 ARG pool, lincosamide and tetracycline resistance genes were found to be the most abundant and the  
209 transposases to be the most common trait related to mobility mode.

Fig. 1.

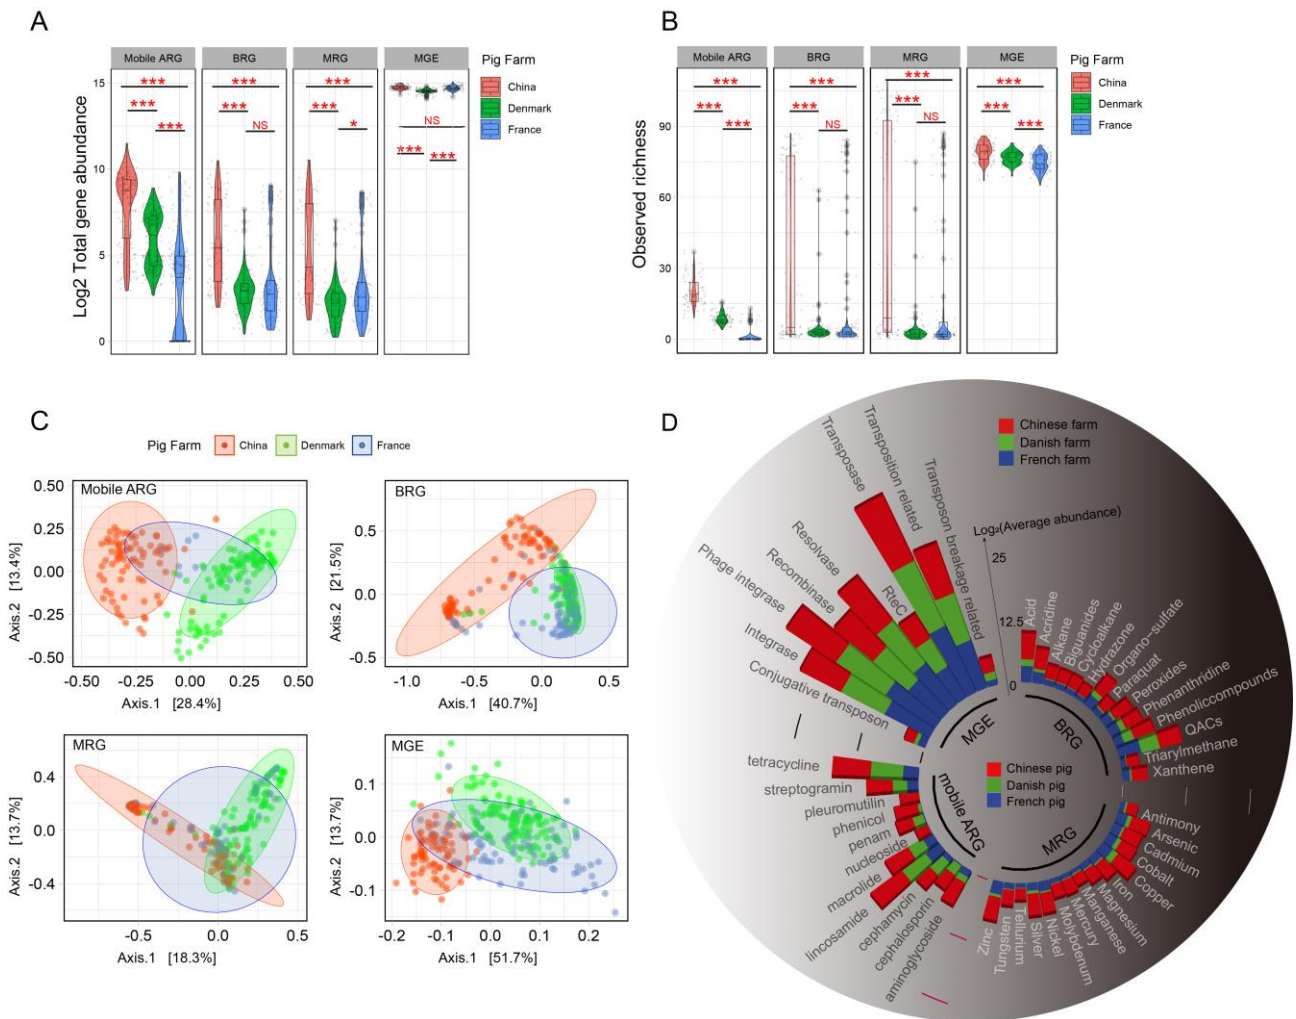

210

211 **Fig. 1. Overview of MRGs, BRGs, mobile ARGs, and MGEs in pig gut microbiomes from**

212 **different farms. A).** Violin plot showing the total abundance of resistance genes and MGE per sample.

213 White lines represent the median. Asterisks stand for significant statistical difference between groups

214 (Pairwise Wilcoxon rank-sum test, FDR-adjusted;  $P < 0.05^*$ ,  $P < 0.01^{**}$ ,  $P < 0.001^{***}$ , NS:  $P > 0.05$ ). **B).**

215 Violin plot showing the observed richness of resistance genes and MGE. White lines represent the

216 median. Asterisks stand for significant statistical difference between groups (TukeyHSD test;  $P < 0.05^*$ ,

217  $P < 0.01^{**}$ ,  $P < 0.001^{***}$ , NS:  $P > 0.05$ ). **C).** PCoA plots showing Bray-Curtis distances of mobile ARG,

218 BRG, MRG and MGE among pigs from Chinese, Danish and French farms. **D).** Average abundance of

219 resistance genes and MGE in the different countries. The abundance of multiple resistance gene was

220 separately counted in the individual function group; for example, the gene with AMR and biocide  
221 resistance (BR) was included both in AMR and BR abundance plots. Labels on the stacked bars describe  
222 the metals and biocides associated with BRGs and MRGs, different drug classes associated with mobile  
223 ARGs and 9 categories of MGEs. Heights of the stacked bars represent the mean value of the total  
224 abundance in log-scale.

225

226

### 227 **Surveying assembled contigs carrying co-occurrence of ARGs and BRGs/MRGs/MGEs**

228 We then investigated the co-occurrence of resistance genes on contigs, in the categories of ARGs,  
229 BRGs/MRGs, and MGEs to evaluate the potential for co-selection (Fig. 2A). Evidently, the pigs in the  
230 Chinese farm had the largest amount of overlap from different categories, with 61 contigs harboring all  
231 3 different categories of genes, while this was not observed in any of the pigs in French and Danish farms.  
232 MGEs were the largest category and had ample overlap with other categories. The pigs in the Chinese  
233 farm had the highest proportion of contigs carrying multiple co-occurrences (Fig. 2B) (Fisher's exact test;  
234 ARGs+MGEs: C vs D,  $P < 2.2e-16$ , odds ratio = 2.69; C vs F,  $P < 2.2e-16$ , odds ratio = 18.5; D vs F:  $P$   
235  $< 2.2e-16$ , odds ratio = 6.87; ARGs+BRGs/MRGs: C vs D,  $P < 2.2e-16$ , odds ratio = 11.8; C vs F,  $P <$   
236  $2.2e-16$ , odds ratio = 2.04; D vs F:  $P < 2.2e-16$ , odds ratio = 0.17; ARGs+BRGs/MRGs+MGEs: C vs  
237 D,  $P < 2.2e-16$ , odds ratio = NA; C vs F,  $P < 2.2e-16$ , odds ratio = NA; D vs F:  $P = 1$ , odds ratio = 0;  
238 BRGs/MRGs+MGEs: C vs D,  $P < 2.2e-16$ , odds ratio = 9.48; C vs F,  $P < 2.2e-16$ , odds ratio = 36.6; D  
239 vs F:  $P = 0.0007$ , odds ratio = 3.86). The pigs in French farms had a significantly higher proportion of  
240 contigs with ARGs and BRGs/MRGs than the pigs in Danish farms. In contrast, the pigs in Danish  
241 farms had a higher proportion of contigs carrying resistance genes together with MGEs than the pigs in  
242 French farms. Compared to BRGs/MRGs, a larger proportion of ARGs generally tended to sit together  
243 with MGEs in the same contigs (Fisher's exact test;  $P < 2.2e-16$ , odds ratio: 2.9) (Fig. 2C).

Fig. 2.

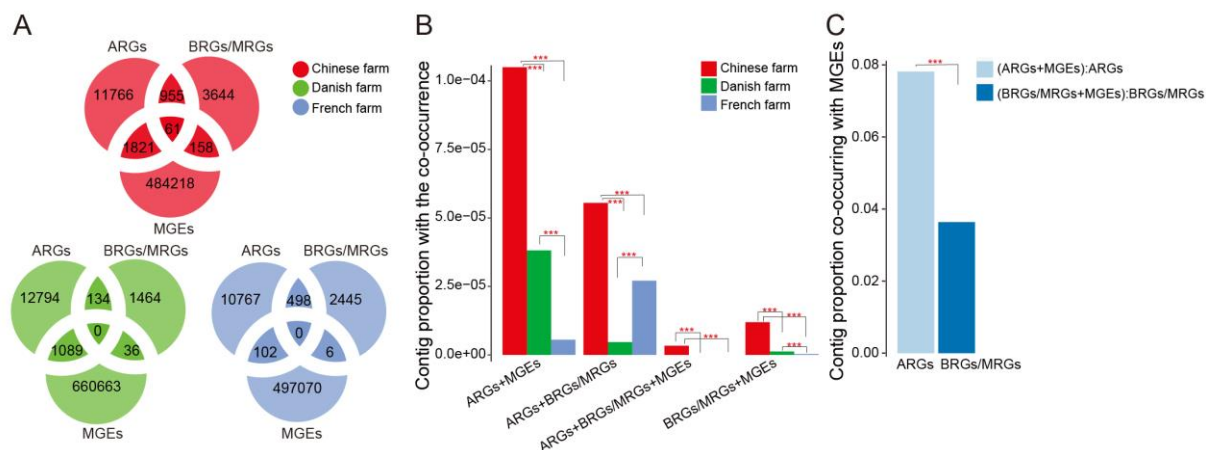

244

245 **Fig. 2. Overview of co-occurrences of ARGs, BRGs, MRGs and MGEs in assembled contigs. A).**

246 Venn diagram showing the number of contigs carrying ARGs, BRGs/MRGs, MGEs and their  
247 combinations in pigs. **B).** The proportion of contigs with co-occurrences of ARGs and BRGs/MRGs,

248 ARGs and MGEs, BRGs/MRGs and MGEs, BRGs/MRGs, ARGs and MGEs in pigs. Asterisks stand

249 for significant statistical difference between groups (Fisher's exact test;  $P < 0.05^*$ ,  $P < 0.01^{**}$ ,  $P < 0.001^{***}$ ).

250 **C).** The proportion of contigs carrying ARGs and BRGs/MRGs with MGEs. Asterisks stand for

251 significant statistical difference between groups (Fisher's exact test;  $P < 0.05^*$ ,  $P < 0.01^{**}$ ,  $P < 0.001^{***}$ ).

252

253

## 254 Co-localization of ARGs and BRGs/MRGs/MGEs in assembled contigs

255 To further verify the co-occurrence of ARGs and BRGs/MRGs/MGEs on the contigs, we visualized

256 the gene organization on representative contigs (Fig. 3A). According to resistances carried in each

257 representative contig, there were six major co-occurrence combinations and 27 co-occurrence subtypes.

258 We selected the contig carrying the most complete gene distribution in each of 27 subgroups as the

259 representative contig. All the co-occurrences involved 131 resistance genes to 17 metals, 28 biocides and

260 25 antibiotics. Of these, Cu, Ni and Zn resistance genes, fluoroquinolone, penam and tetracycline

261 resistance genes, acid and QAC resistance genes were the most co-occurring genes. The information

262 about these genes has been summarized in Table S2.

263

264 Co-occurrences in the pigs from the Chinese farm were detected to be most common, in terms of  
265 both the number of contigs carrying co-occurrences and the type of co-occurrence (Fig. 3A). We  
266 identified all 27 co-occurrence subtypes in the Chinese farm, 20 subtypes in French farms, and 9 subtypes  
267 in Danish farms. Some co-occurrences affiliated with the same subtype were only partly present in the  
268 representative contig. Therefore, to further investigate the abundance of co-occurrences, we plotted a  
269 network to show the frequency of co-occurrences between resistance genes in all the contigs (Fig. S1).  
270 The detailed information for the network has been summarized in Table S3. As shown in Fig. S1,  
271 ARGs in the pigs from Danish farms mostly co-occurred with BRGs, which mostly tended to be  
272 functionally associated, such as multidrug efflux transporter genes *acrAB* and its regulator gene *acrR*.  
273 Notably, we detected an assembled contig carrying one colistin resistance gene *MCR-4* and Cd/TBT  
274 resistance gene *ygjW* in the pigs from Danish farms.

275

276 Some co-occurrences were only detected in the pigs from the Chinese farm (Fig. 3A) – for example, the  
277 co-occurrence of fluoroquinolone ARG *CRP* with the Ni resistance operon *nikA/B/C/D/E/R* and Zn  
278 resistance gene *zntA*; the co-occurrence of aminoglycoside ARG *kdpE* with nine Cu resistance genes  
279 *cusA/B/C/F/R/S*, *cutE/F*, *corC*; and the co-occurrence of streptogramin ARG *vgaC* with seven Cu  
280 resistance genes *pcoA/B/C/D/E/R/S*. Two archetypal Class I clinical integrons carrying 3' conserved  
281 segment (CS) of an antiseptic-resistance gene *qacEΔ1*, a sulfonamide resistance gene *sul1*, 5' CS of the  
282 integrase, as well as gene cassettes *aadA2-dfrA17* (Integron A) or an IS6 transposase gene (Integron B)  
283 were only detected in the pigs from the Chinese farm. An analogous structure consisted of *qacF*, *sul3*, an  
284 integrase, and gene cassette *dfrA12-aadA2-cmlA6-aadA* was only detected in the pigs from the Chinese  
285 farm as well (Integron C). To verify whether these three integrons are located on plasmids, we mapped  
286 the three representative contigs against the PLSDB plasmid database (Galata et al., 2019). It turned out  
287 that Integron C and Integron B were very similar to DNA fragments in 180 and 73 plasmids, respectively

288 (Mash search, Max distance=0.1). Integron C was frequently found in *E. coli*, *Klebsiella pneumonia* and  
289 *Salmonella enterica* (Fig. S2-a and Table S4). The bacteria harboring Integron B covered a wide range of  
290 species such as *E. coli*, *Pseudomonas aeruginosa*, *Klebsiella pneumonia* and *Enterobacter cloacae* (Fig. S2-c and Table  
291 S5). The gut microbiome in the pigs from the Chinese farm harbored some co-occurrences related to  
292 polymyxin including colistin resistance genes. For example, the polymyxin ARG *ugd* was located in the  
293 same contig with Co-Ni-Fe related resistance genes *rvnA/B/R*, multidrug efflux system *MdtA/B/C*,  
294 *BaeS/R* two-component system; Polymyxin resistance genes *pmrA/B/C*, colistin heteroresistance related  
295 *soxR/S*, co-occurred with Cu resistance gene *cutA*, acid resistance gene *actP*, Cd-Hg-TBT-H<sub>2</sub>O<sub>2</sub>-HCl  
296 resistance gene *PA0320* and a phage integrase.

297

298 Some co-occurrences were detected in pigs from both French and Chinese farms. For example, the  
299 polymyxin resistance gene *pmrF*, fosfomycin resistance gene *GlpT*, microcin J25 resistance gene *YojI* were  
300 found on the same contig with a QACs- H<sub>2</sub>O<sub>2</sub> resistance gene *kpnO* and a Fe resistance gene *pmrG*; The  
301 genes encoding the two-component regulatory system *CpxAR* co-occurred with Fe-Zn resistance gene  
302 *fieF*, Se-H<sub>2</sub>O<sub>2</sub> resistance gene *sodA* and Sb-As-glycerol uptake and resistance gene *glpF*; Cu resistance gene  
303 *copA*, *cueR* and Fe-H<sub>2</sub>O<sub>2</sub> resistance genes *fetA*, *fetB* were frequently detected to co-occur with genes  
304 encoding the *AcrR/A/B* multidrug efflux pump operon; And acid resistance genes including *gadE*, *hdeA*,  
305 *hdeB*, *mdtE*, *mdtF*, *gadW*, *gadX*, *gadA* were located in the same contig with Zn-Te resistance gene *pitA* and  
306 As resistance gene *arsA/B/R*; Beta-lactam resistance gene *PBP3* was found to co-occur with two Cu  
307 resistance gene *corD*, *cueO*, Fe resistance gene *yjgH* (only in Chinese pigs), one BRG *ostA* and one  
308 transposase gene; A Cd-H<sub>2</sub>O<sub>2</sub>-HCl resistance gene *ybcN* co-occurred with the efflux pump system *AcrE/F*  
309 and its repressor *AcrS*; A broad spectrum MDR ABRG *mdfA* was detected in the same contig with Cr-  
310 nitrofurantoin resistance gene *nfsA*.

311

312 In this study, we plotted a network to demonstrate the co-occurrences between ARGs and MGEs in  
313 the same contigs (Fig. 3B). In total, 282/1261 ARGs were co-located with MGEs on the same contigs,  
314 referred to as mobile ARGs. Mobile ARGs are abundant in the pigs from Chinese and Danish farms,  
315 especially transposase. The mobile lincosamide resistance gene *lnuC* was most detected in all three  
316 farms. The mobile cephamycin resistance genes *CfxA2/CfxA6* and penam resistance gene *ACI-1* were  
317 also abundant in the pigs from Danish and Chinese farms. Some tetracycline resistance genes  
318 (*tet(40)/(42)/(C)/(D)/44/W/O/Q/X/adeF*), macrolide resistance genes (*ermA/B/F/G/Q*) and  
319 aminoglycoside resistance genes (*ANT(6)-Ia/ANT(6)-Ib/APH(2)-IIa/APH(3)-Ib/APH(3)-*  
320 *IIIa/APH(6)-Id/aadA/aadA2*) were also frequently detected to co-locate with MGEs in the same contigs.  
321 The polymyxin resistance gene *pmrF* was found to be in the vicinity of genes encoding transposases  
322 in the same contig. Colistin resistance-related genes *mexB* and *oprM*, and polymyxin B resistance gene  
323 *eptA* were also detected to co-occur with MGEs in Chinese and Danish pigs. The detailed information  
324 for the network has been summarized in Table S6.

Fig. 3.

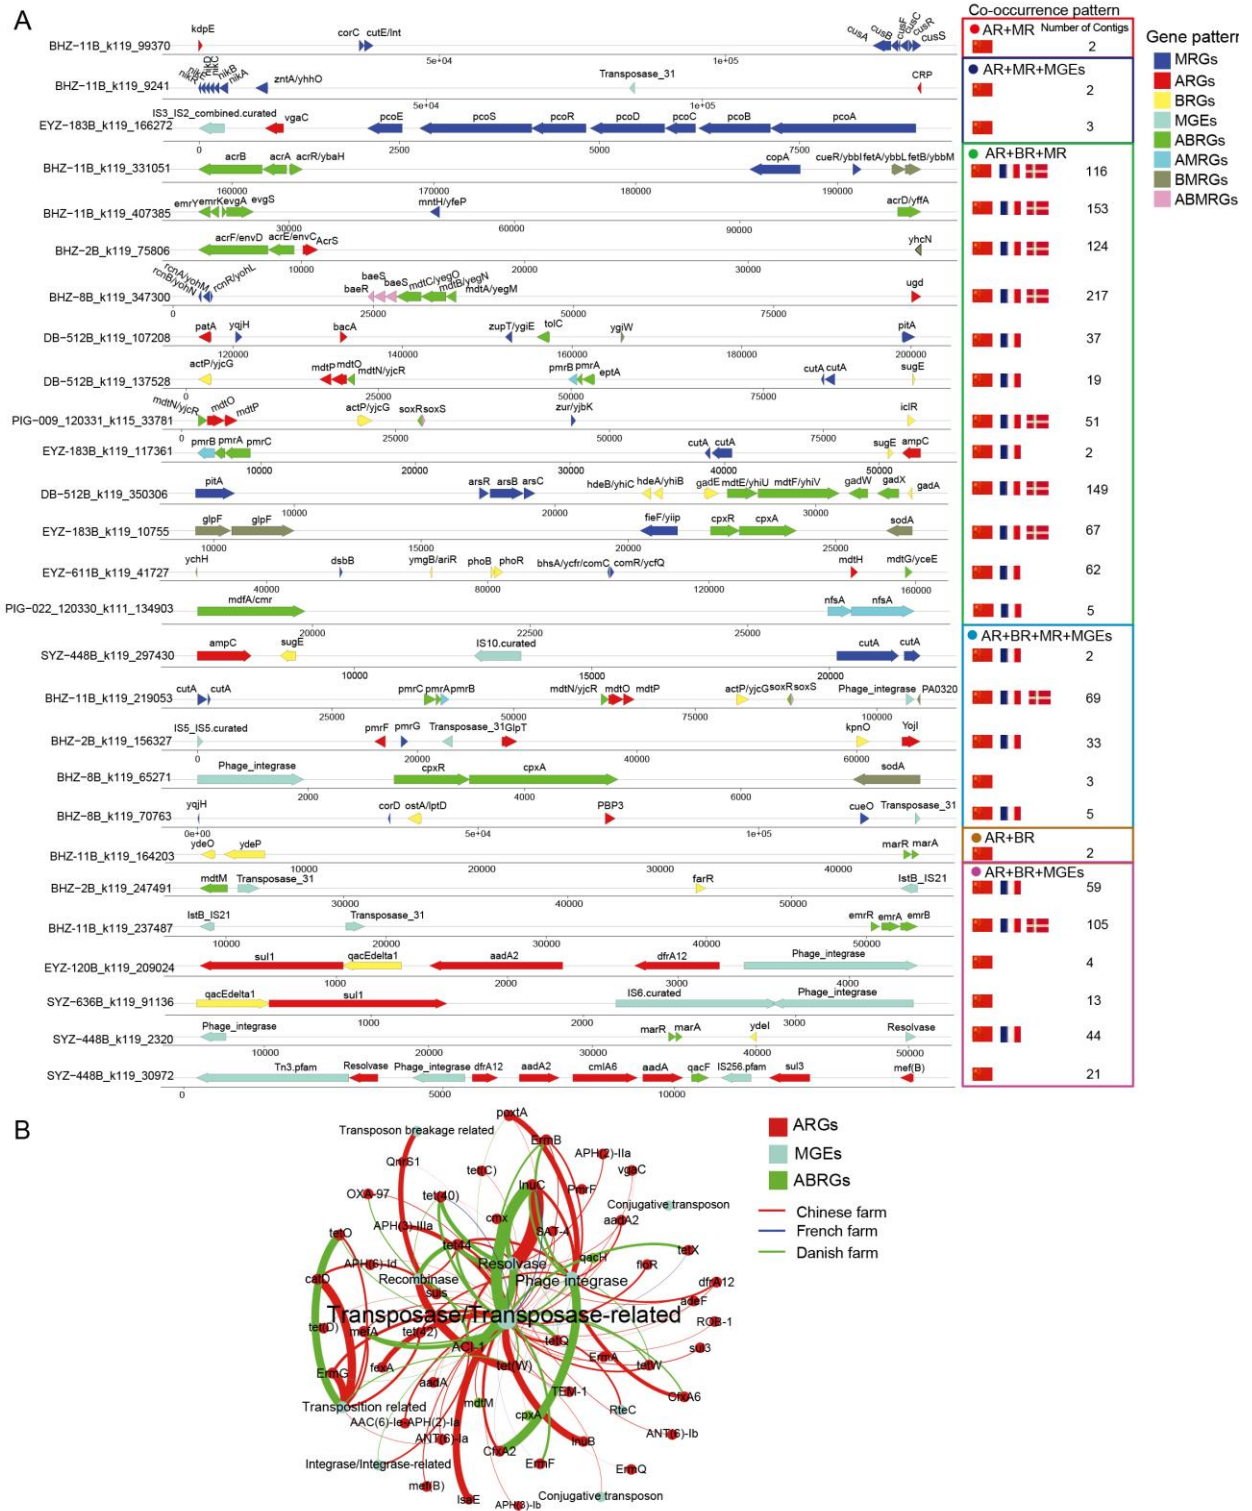

325

326 **Fig. 3. The patterns of Co-occurrence in assembled contigs. A)** The arrangement of resistance genes

327 within the co-occurrences-carrying representative contigs. Only those co-occurrences present in at least



328 two different contigs are listed. ABRG stands for the gene conveying resistance to antibiotic and biocide;  
329 AMRG stands for the gene conveying resistance to antibiotic and metal; BMRG stands for the gene  
330 conveying resistance to biocide and metal; ABMRG stands for the gene conveying resistance to antibiotic,  
331 biocide and metal. The location and size of genes are proportional to the actual condition; the country  
332 flag stands for the location of the farm raising the pigs that have the corresponding co-occurrences and  
333 its row order stands for the decreasing co-occurrence frequency. **B)** Network of co-occurring ARGs and  
334 MGEs on the same contigs. For view purposes, only the co-occurrences between ARGs and MGEs  
335 which are present in at least 5 different contigs are shown in this network. The size of node, node  
336 label and the weight of edge are proportional to the number of co-occurred contigs.

337

338 **Mobilizable contigs carrying ARG, BRG/MRG and MGEs are concentrated in**  
339 *Enterobacteriaceae*

340 To investigate which clades of bacteria tended to maintain and spread ARGs in the form of co-selection  
341 and also confirm the accuracy of contig assembly, we blasted the contigs carrying ARGs, MGEs,  
342 BRGs/MRGs against the NCBI RefSeq database consisting of 138, 683 genomes. All the contigs could  
343 be found in reference genomes. The tree in Fig. 4 demonstrated that those mapped bacteria and the size  
344 of nodes was proportional to the mapped occurrence of the bacterial taxa. Proteobacteria was the most  
345 often hit phylum, under which family *Enterobacteriaceae* had the biggest class branch. Notably, the  
346 opportunistic pathogen *E. coli* and the pathogen *Shigella flexneri* were the most mapped species (Fig. 4).

Fig. 4.

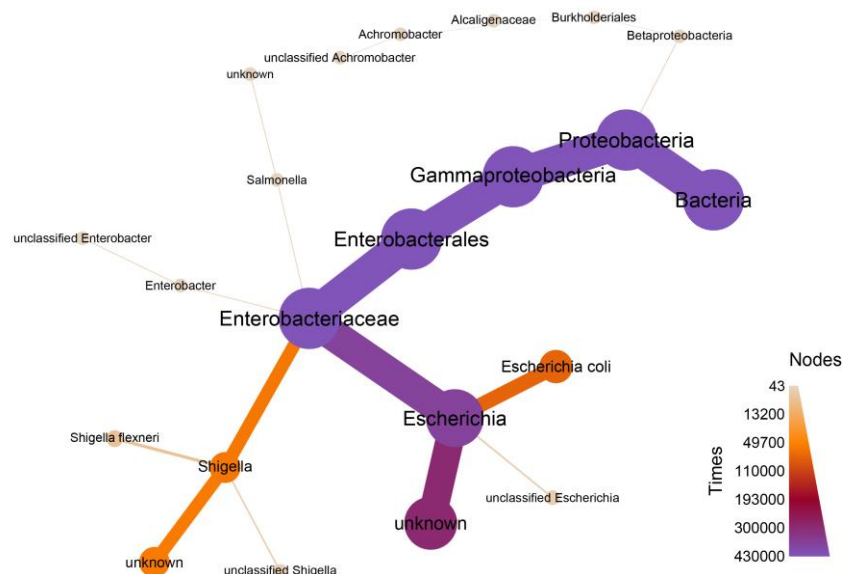

347

348

349 **Fig. 4. Tree showing bacteria harboring contigs with ARGs, MGEs, MRGs/BRGs.** The node size,

350 node label size, and edge weight were proportional to mapped frequency. All the bacteria taxa that had a

351 successful match have been shown in Table S7.

352

## 353 Discussion

354 The current study provides a comprehensive analysis based on the genetic linkage of bacterial co-

355 occurrence profiles between ARGs and other genetic elements including MRGs, BRGs and MGEs in

356 the gut microbiome of 278 pigs from Danish, French and Chinese farms. The antibiotic feeding mode

357 of pigs in the Chinese, Danish and French farms can stand for an unmonitored mode, European standard

358 mode and organic mode, respectively. Compared to antibiotics, the usage of metals as a growth promotor

359 in pig farming has received little restriction around the world. But even worse, unmonitored biocide usage

360 as a disinfectant in the pigsty and its residual in vegetable feed did so far not cause much attention. In

361 this study, we found a positive association between the extent of antibiotic use and the load of mobile

362 ARGs. The gut of pigs in the Chinese farm contained the most abundant mobile ARGs, followed by pigs

363 from Danish farms and lastly the pigs from French farms. The abundance and type of MRGs and BRGs

364 did not vary a lot among the different farms. Pigs in all farms had abundant MRGs and BRGs, especially

365 genes encoding resistances for Zn, Cu, Ag, Ni, As, Cd, QAC. In general, Cu and Zn are the most common  
366 growth promoters in animal feeding and residuals can be always found in manure (Mazhar et al., 2021).  
367 QAC resistance BRG was frequently found in the pigs from all farms. Over the past decade, the use of  
368 QACs as detergent, disinfectant and preservative has dramatically increased in industry, hospitals, and  
369 cosmetics (Buffet-Bataillon et al., 2012), accompanied by an elevated occurrence of QAC resistance genes  
370 in many bacteria (Bischoff et al., 2011; Heir et al., 1999; Langsrud et al., 2003; Seier-Petersen et al., 2015;  
371 Zmantar et al., 2011). Unfortunately, we cannot provide an effects size estimate using our study, since no  
372 quantitative or qualitative data on the use of these compounds was collected. In addition to the  
373 widespread use of QACs, the spread of these resistance genes via HGT among prokaryotes may be  
374 another reason for their widespread presence since a significant correlation between QAC resistance  
375 genes and MGEs was detected in this study. The spread of resistance determinants through HGT is a  
376 favored way for microbes to adapt to complex environmental pressures (Ye et al., 2017). In this study,  
377 around 10.8% (282/1261) ARGs, which co-occurred with MGEs especially genes encoding transposase,  
378 had the potential to be transferred via HGT. Some previous work had shown that the levels of  
379 transposases were highly correlated to the abundance of ARGs from other environments (Aziz et al.,  
380 2010; Zhu et al., 2013).

381

382 In this study, co-selection phenomena were investigated via co-occurrence patterns as a proxy. We found  
383 that regardless of antibiotics use or little/no antibiotic use, AMR seems to be maintained by co-  
384 occurrence with MRGs/BRGs. Despite little/no antibiotic use in Danish and French farms, cross-  
385 resistance, for example, *mdtA/B*, *mdtE/F*, *mdtN/O*, *cpxA/R*, *acrA/B/R*, *acrE/F*, *emrA/B/R*, *emrK/Y*,  
386 *gadA/X/W*, *baeR/S*, *soxS/R*, which have multidrug resistance towards antibiotics, biocides and/or metals,  
387 can still help to maintain AMR under exposure stress from biocides and/or metals. Of these, some  
388 multidrug resistance genes can encode multiple-component regulatory systems that mediate co-regulation  
389 as well. For example, the BaERS two-component regulatory system can activate transcription of many

390 resistance genes (Nishino et al., 2005) such as *mdtA/B/C/D* transporter gene clusters and *acrD* (Baranova  
391 and Nikaido, 2002; Nagakubo et al., 2002). The CpxAR two-component regulatory system can activate  
392 transcription of the multiple antibiotic resistance regulatory operon *marA/B/R* (Weatherspoon-Griffin  
393 et al., 2014). *soxS* can enhance the expression of the Zn uptake system ZnuACB (Warner and Levy, 2012)  
394 and the AcrAB-TolC multidrug efflux protein complex (Pérez et al., 2012). In addition to cross-resistance,  
395 co-resistance phenomena detected in the pigs especially from French farms further highlighted the role  
396 of metals/biocides on the maintenance and spread of ARGs. These co-resistance patterns were either  
397 functionally connected such as in *acrA/B/R* or probably reflected the historical and current chemical  
398 environments (Ye et al., 2017). Zhu *et al* found that the co-selection of Cu, Zn, tetracycline resistance  
399 determinants and MGEs would be favored in exposed microbial communities due to the use of Cu, Zn,  
400 and antibiotics such as tetracycline in pig farming (Zhu et al., 2013). Accordingly, we speculate that  
401 microbes in the gut of pigs faced the selection pressures from metals, antibiotics and biocides including  
402 Cu, Ni, Zn, fluoroquinolone, penam, tetracycline, cephalosporin, Acid, QACs, Acridine, *etc.* In summary,  
403 antibiotics are not the sole factor for the spread and preservation of ARGs in their ecological  
404 environment.

405

406 Notably, we found some polymyxin resistance genes and their co-occurrences with other resistance genes.  
407 As we know, polymyxins have reemerged as a final line of defense against Gram-negative 'superbugs'  
408 (Sun et al., 2018). The co-occurrences of polymyxin resistance genes and other resistance genes would  
409 aggravate their spread and maintenance. In this study, although we found integrons carrying ARG  
410 cassette in pigs only from the Chinese farm, the plasmids carrying these integrons have been found  
411 around the world (Fig. S2-b/d) and mostly in pathogens. The co-occurrence between QAC resistance  
412 genes *qacF/qacEΔ1* and ARG cassettes in the integrons could help AMR maintenance in pathogens.  
413 Similarly, Gaze *et al* found that the incidence of Class I integrons was significantly higher for bacteria  
414 exposure to QACs (Gaze et al., 2005).

415

416 Enterobacteriaceae tend to have more ARGs/MRGs/MGEs-carrying DNA fragments, especially in *E.*  
417 *coli* and *Shigella flexneri*. *E. coli* is known to carry a high degree of ARGs (Li et al., 2021) and *Shigella flexneri*  
418 can cause a variety of communicable bacterial dysenteries in their hosts (Jennison and Verma, 2004). The  
419 era of plentiful antibiotics is forcing more bacteria to develop ARGs to survive and grow in the newly  
420 established toxic environment, while non-degradable metals and easily accessible biocides probably  
421 further promote the maintenance and spread of AMR in the form of co-occurrence investigated in this  
422 study, which represents an increased public health risk.

423 While this study can distinguish patterns of co-selection that align with countries and farms that are  
424 known to have large differences in antibiotics usage, it is a limitation that there are no observations on  
425 many other aspects of farming practices. Cleaning agents and frequency would be particularly pertinent  
426 given the observed co-selection of biocide resistance genes, but other differences in cultural and  
427 regulatory practices could impact both the microbiome and the resistome this can harbor. Ideally,  
428 observations of fully factorial designs could be used to separate the variance of these, but ultimately  
429 intervention designs are needed to establish practices that can minimize the horizontal spread of ARGs.  
430

## 431 **Conclusion**

432 In this study, we have used publicly available data to map the mobilizable resistance genes in pig gut  
433 microbiomes and exploited the patterns of co-selection by non-antibiotic factors. The genetic evidence  
434 presented here clearly suggests these factors contribute to the maintenance of AMR in pig farming. We  
435 demonstrate the commonness of this co-selection with genetic evidence and augment this with an  
436 overview of mobilizing elements. We clarify that this maintenance is not a random selection from a  
437 mobilized pool but pertains to specific phylogenetic clades. We hope this work will give further insights  
438 into the genetics of co-selection and the implications of non-pharmaceutical antibiotic agent usage in the

439 propagation of AMR. Specifically, this work illustrates the need for a comprehensive survey of co-  
440 selection potential for effective agronomic practices policymaking aiming for a reduction of the global  
441 AMR burden in a One Health approach.

442

## 443 **Acknowledgments**

444 We thank Chinese scholarship council and Novo Nordisk Foundation for funding support. ADB was  
445 supported by the Danish Council of Independent Research (grant 6111-00471B) and Lundbeck  
446 Foundation (grant R140–2013-13528).

447

## 448 **CRedit authorship contribution statement**

449 **Xuanji Li:** Data collection, Project administration, Analysis, Writing - original draft. **Christopher**  
450 **Rensing:** Project administration, Writing - review & editing. **Gisle Vestergaard:** Methodology, Writing  
451 - review & editing. **Joseph Nesme:** Project administration, Writing - review & editing. **Shashank Gupta:**  
452 Project administration, Writing - review & editing. **Manimozhiyan Arumugam:** Methodology, Writing  
453 - review & editing. **Asker Daniel Brejnrod:** Data collection, Supervision, Analysis, Writing - review &  
454 editing. **Søren Johannes Sørensen:** Supervision, Writing - review & editing, Funding acquisition.

455

## 456 **Conflict of Interest**

457 The authors declare no competing interests.

458

## 459 **References**

460 Arbizu, M., 2017. PairwiseAdonis: Pairwise multilevel comparison using adonis. R Packag. Version 0.0

461 1. <https://doi.org/https://github.com/pmartinezarbizu/pairwiseAdonis>

462 Ashbolt, N.J., Amézquita, A., Backhaus, T., Borriello, P., Brandt, K.K., Collignon, P., Coors, A., Finley,

- 463 R., Gaze, W.H., Heberer, T., Lawrence, J.R., Larsson, D.G.J., McEwen, S.A., Ryan, J.J., Schönfeld,  
464 J., Silley, P., Snape, J.R., Van den Eede, C., Topp, E., 2013. Human health risk assessment  
465 (HHRA) for environmental development and transfer of antibiotic resistance. *Environ. Health*  
466 *Perspect.* <https://doi.org/10.1289/ehp.1206316>
- 467 Aziz, R.K., Breitbart, M., Edwards, R.A., 2010. Transposases are the most abundant, most ubiquitous  
468 genes in nature. *Nucleic Acids Res.* <https://doi.org/10.1093/nar/gkq140>
- 469 Baker-Austin, C., Wright, M.S., Stepanauskas, R., McArthur, J. V., 2006. Co-selection of antibiotic and  
470 metal resistance. *Trends Microbiol.* 14, 176–182. <https://doi.org/10.1016/j.tim.2006.02.006>
- 471 Baranova, N., Nikaido, H., 2002. The BaeSR two-component regulatory system activates transcription  
472 of the yegMNOB (mdtABCD) transporter gene cluster in *Escherichia coli* and increases its  
473 resistance to novobiocin and deoxycholate. *J. Bacteriol.* 184, 4168–4176.  
474 <https://doi.org/10.1128/JB.184.15.4168-4176.2002>
- 475 Benveniste, R., Davies, J., 1973. Aminoglycoside antibiotic inactivating enzymes in actinomycetes  
476 similar to those present in clinical isolates of antibiotic resistant bacteria. *Proc. Natl. Acad. Sci. U.*  
477 *S. A.* <https://doi.org/10.1073/pnas.70.8.2276>
- 478 Bischoff, M., Bauer, J., Preikschat, P., Schwaiger, K., Mölle, G., Hölzel, C., 2011. First Detection of the  
479 Antiseptic Resistance Gene qac A/B in *Enterococcus faecalis*. *Microb. Drug Resist.* 18, 7–12.  
480 <https://doi.org/10.1089/mdr.2011.0092>
- 481 Buchfink, B., Xie, C., Huson, D.H., 2014. Fast and sensitive protein alignment using DIAMOND. *Nat.*  
482 *Methods* 12, 59–60. <https://doi.org/10.1038/nmeth.3176>
- 483 Buffet-Bataillon, S., Tattevin, P., Bonnaure-Mallet, M., Jolivet-Gougeon, A., 2012. Emergence of  
484 resistance to antibacterial agents: The role of quaternary ammonium compounds - A critical  
485 review. *Int. J. Antimicrob. Agents* 39, 381–389. <https://doi.org/10.1016/j.ijantimicag.2012.01.011>
- 486 Chapman, J.S., 2003. Disinfectant resistance mechanisms, cross-resistance, and co-resistance. *Int.*  
487 *Biodeterior. Biodegrad.* 51, 271–276. [https://doi.org/10.1016/S0964-8305\(03\)00044-1](https://doi.org/10.1016/S0964-8305(03)00044-1)

- 488 Chen, H., Boutros, P.C., 2011. VennDiagram: A package for the generation of highly-customizable  
489 Venn and Euler diagrams in R. *BMC Bioinformatics* 12. [https://doi.org/10.1186/1471-2105-12-](https://doi.org/10.1186/1471-2105-12-35)  
490 35
- 491 Clark, E.A., 2004. Benefits of Re-Integrating Livestock and Forages in Crop Production Systems. *J.*  
492 *Crop Improv.* [https://doi.org/10.1300/J411v12n01\\_06](https://doi.org/10.1300/J411v12n01_06)
- 493 Finn, R.D., Coghill, P., Eberhardt, R.Y., Eddy, S.R., Mistry, J., Mitchell, A.L., Potter, S.C., Punta, M.,  
494 Qureshi, M., Sangrador-Vegas, A., Salazar, G.A., Tate, J., Bateman, A., 2016. The Pfam protein  
495 families database: Towards a more sustainable future. *Nucleic Acids Res.*  
496 <https://doi.org/10.1093/nar/gkv1344>
- 497 Foster, Z.S.L., Sharpton, T.J., Grünwald, N.J., 2017. Metacoder: An R package for visualization and  
498 manipulation of community taxonomic diversity data. *PLoS Comput. Biol.*  
499 <https://doi.org/10.1371/journal.pcbi.1005404>
- 500 Galata, V., Fehlmann, T., Backes, C., Keller, A., 2019. PLSDB: a resource of complete bacterial  
501 plasmids. *Nucleic Acids Res.* <https://doi.org/10.1093/nar/gky1050>
- 502 Gaskins, H.R., Collier, C.T., Anderson, D.B., 2002. Antibiotics as growth promotants: Mode of action.  
503 *Anim. Biotechnol.* 13, 29–42. <https://doi.org/10.1081/ABIO-120005768>
- 504 Gaze, W.H., Abdouslam, N., Hawkey, P.M., Wellington, E.M.H., 2005. Incidence of class 1 integrons  
505 in a quaternary ammonium compound-polluted environment. *Antimicrob. Agents Chemother.*  
506 <https://doi.org/10.1128/AAC.49.5.1802-1807.2005>
- 507 Goossens, H., Ferech, M., Vander Stichele, R., Elseviers, M., 2005. Outpatient antibiotic use in Europe  
508 and association with resistance: A cross-national database study. *Lancet.*  
509 [https://doi.org/10.1016/S0140-6736\(05\)70799-6](https://doi.org/10.1016/S0140-6736(05)70799-6)
- 510 Grande Burgos, M.J., Pérez Pulido, R., Gálvez, A., Abriouel, H., Fernández-Fuentes, M.A., Ortega  
511 Morente, E., 2013. Biocide tolerance in bacteria. *Int. J. Food Microbiol.* 162, 13–25.  
512 <https://doi.org/10.1016/j.ijfoodmicro.2012.12.028>



- 513 Hartmann, E.M., Hickey, R., Hsu, T., Betancourt Román, C.M., Chen, J., Schwager, R., Kline, J.,  
514 Brown, G.Z., Halden, R.U., Huttenhower, C., Green, J.L., 2016. Antimicrobial Chemicals Are  
515 Associated with Elevated Antibiotic Resistance Genes in the Indoor Dust Microbiome. *Environ.*  
516 *Sci. Technol.* 50, 9807–9815. <https://doi.org/10.1021/acs.est.6b00262>
- 517 Heir, E., Sundheim, G., Holck, A.L., 1999. The *qacG* gene on plasmid pST94 confers resistance to  
518 quaternary ammonium compounds in staphylococci isolated from the food industry. *J. Appl.*  
519 *Microbiol.* <https://doi.org/10.1046/j.1365-2672.1999.00672.x>
- 520 Hyatt, D., Chen, G.L., LoCascio, P.F., Land, M.L., Larimer, F.W., Hauser, L.J., 2010. Prodigal:  
521 Prokaryotic gene recognition and translation initiation site identification. *BMC Bioinformatics.*  
522 <https://doi.org/10.1186/1471-2105-11-119>
- 523 Içgen, B., Yılmaz, F., 2014. Co-occurrence of antibiotic and heavy metal resistance in Kizilirmak River  
524 isolates. *Bull. Environ. Contam. Toxicol.* 93, 735–743. [https://doi.org/10.1007/s00128-014-1383-](https://doi.org/10.1007/s00128-014-1383-6)  
525 6
- 526 Jennison, A. V., Verma, N.K., 2004. *Shigella flexneri* infection: Pathogenesis and vaccine development.  
527 *FEMS Microbiol. Rev.* <https://doi.org/10.1016/j.femsre.2003.07.002>
- 528 Jensen, J., Larsen, M.M., Bak, J., 2016. National monitoring study in Denmark finds increased and  
529 critical levels of copper and zinc in arable soils fertilized with pig slurry. *Environ. Pollut.*  
530 <https://doi.org/10.1016/j.envpol.2016.03.034>
- 531 Ji, X., Shen, Q., Liu, F., Ma, J., Xu, G., Wang, Y., Wu, M., 2012. Antibiotic resistance gene abundances  
532 associated with antibiotics and heavy metals in animal manures and agricultural soils adjacent to  
533 feedlots in Shanghai; China. *J. Hazard. Mater.* 235–236, 178–185.  
534 <https://doi.org/10.1016/j.jhazmat.2012.07.040>
- 535 Jia, B., Raphenya, A.R., Alcock, B., Waglechner, N., Guo, P., Tsang, K.K., Lago, B.A., Dave, B.M.,  
536 Pereira, S., Sharma, A.N., Doshi, S., Courtot, M., Lo, R., Williams, L.E., Frye, J.G., Elsayegh, T.,  
537 Sardar, D., Westman, E.L., Pawlowski, A.C., Johnson, T.A., Brinkman, F.S.L., Wright, G.D.,

- 538 McArthur, A.G., 2017. CARD 2017: Expansion and model-centric curation of the comprehensive  
539 antibiotic resistance database. *Nucleic Acids Res.* <https://doi.org/10.1093/nar/gkw1004>
- 540 Langsrud, S., Sidhu, M.S., Heir, E., Holck, A.L., 2003. Bacterial disinfectant resistance - A challenge for  
541 the food industry, in: *International Biodeterioration and Biodegradation*.  
542 [https://doi.org/10.1016/S0964-8305\(03\)00039-8](https://doi.org/10.1016/S0964-8305(03)00039-8)
- 543 Lekagul, A., Tangcharoensathien, V., Yeung, S., 2019. Patterns of antibiotic use in global pig  
544 production: A systematic review. *Vet. Anim. Sci.* <https://doi.org/10.1016/j.vas.2019.100058>
- 545 Li, B., Yang, Y., Ma, L., Ju, F., Guo, F., Tiedje, J.M., Zhang, T., 2015. Metagenomic and network  
546 analysis reveal wide distribution and co-occurrence of environmental antibiotic resistance genes.  
547 *ISME J.* 9, 2490–2502. <https://doi.org/10.1038/ismej.2015.59>
- 548 Li, D., Liu, C.M., Luo, R., Sadakane, K., Lam, T.W., 2015. MEGAHIT: An ultra-fast single-node  
549 solution for large and complex metagenomics assembly via succinct de Bruijn graph.  
550 *Bioinformatics.* <https://doi.org/10.1093/bioinformatics/btv033>
- 551 Li, H., 2013. Aligning sequence reads, clone sequences and assembly contigs with BWA-MEM. *arXiv*  
552 *Prepr.* 00, 1–3. <https://doi.org/10.1186/s13756-018-0352-y>
- 553 Li, H., Handsaker, B., Wysoker, A., Fennell, T., Ruan, J., Homer, N., Marth, G., Abecasis, G., Durbin,  
554 R., 2009. The Sequence Alignment/Map format and SAMtools. *Bioinformatics* 25, 2078–2079.  
555 <https://doi.org/10.1093/bioinformatics/btp352>
- 556 Li, L.G., Xia, Y., Zhang, T., 2017. Co-occurrence of antibiotic and metal resistance genes revealed in  
557 complete genome collection. *ISME J.* 11, 651–662. <https://doi.org/10.1038/ismej.2016.155>
- 558 Li, X., Stokholm, J., Brejnrod, A., Alberg Vestergaard, G., Russel, J., Trivedi, U., Thorsen, J., Gupta, S.,  
559 Hjort Hjelmsø, M., A Shah, S., Arendt Rasmussen, M., Bisgaard, H., Soerensen, S.J., 2021. The  
560 Infant Gut Resistome is Shaped by Environmental Exposures, and Associates with Gut Bacterial  
561 Maturity and Asthma-Associated Bacterial Composition. *SSRN Electron. J.*  
562 <https://doi.org/10.2139/ssrn.3762767>

- 563 Mazhar, S.H., Li, X., Rashid, A., Su, J., Xu, J., Brejnrod, A.D., Su, J.-Q., Wu, Y., Zhu, Y.-G., Zhou,  
564 S.G., Feng, R., Rensing, C., 2021. Co-selection of antibiotic resistance genes, and mobile genetic  
565 elements in the presence of heavy metals in poultry farm environments. *Sci. Total Environ.* 755.  
566 <https://doi.org/10.1016/j.scitotenv.2020.142702>
- 567 McMurdie, P.J., Holmes, S., 2013. Phyloseq: An R Package for Reproducible Interactive Analysis and  
568 Graphics of Microbiome Census Data. *PLoS One* 8.  
569 <https://doi.org/10.1371/journal.pone.0061217>
- 570 Montfoort JA, Poel P van der, L.R., n.d. The use of disinfectants in livestock farming.pdf.
- 571 Nagakubo, S., Nishino, K., Hirata, T., Yamaguchi, A., 2002. The putative response regulator BaeR  
572 stimulates multidrug resistance of *Escherichia coli* via a novel multidrug exporter system,  
573 MdtABC. *J. Bacteriol.* <https://doi.org/10.1128/JB.184.15.4161-4167.2002>
- 574 Nishino, K., Honda, T., Yamaguchi, A., 2005. Genome-wide analyses of *Escherichia coli* gene  
575 expression responsive to the BaeSR two-component regulatory system. *J. Bacteriol.* 187, 1763–  
576 1772. <https://doi.org/10.1128/JB.187.5.1763-1772.2005>
- 577 Oksanen, A.J., Kindt, R., Legendre, P., Hara, B.O., Simpson, G.L., Stevens, M.H.H., Wagner, H.,  
578 Oksanen, J., O'Hara, B., Solymos, P.M., Kindt, R., Legendre, P., O'Hara, B., Simpson, G.L.,  
579 Solymos, P.M., Stevens, M.H.H., Wagner, H., Oksanen, A.J., Kindt, R., Legendre, P., Hara, B.O.,  
580 Simpson, G.L., Stevens, M.H.H., Wagner, H., Oksanen, J., O'Hara, B., Solymos, P.M., Kindt, R.,  
581 Legendre, P., O'Hara, B., Simpson, G.L., Solymos, P.M., Stevens, M.H.H., Wagner, H., 2008. The  
582 vegan package. *Ecol. Packag.* 190.
- 583 Pal, C., Bengtsson-Palme, J., Kristiansson, E., Larsson, D.G.J., 2015. Co-occurrence of resistance genes  
584 to antibiotics, biocides and metals reveals novel insights into their co-selection potential Chandan.  
585 *BMC Genomics* 16, 1–14. <https://doi.org/10.1186/s12864-015-2153-5>
- 586 Pal, C., Bengtsson-Palme, J., Rensing, C., Kristiansson, E., Larsson, D.G.J., 2014. BacMet: Antibacterial  
587 biocide and metal resistance genes database. *Nucleic Acids Res.* 42, 737–743.

- 588 <https://doi.org/10.1093/nar/gkt1252>
- 589 Pérez, A., Poza, M., Aranda, J., Latasa, C., Medrano, F.J., Tomás, M., Romero, A., Lasa, I., Bou, G.,  
590 2012. Effect of Transcriptional Activators SoxS, RobA, and RamA on Expression of Multidrug  
591 Efflux Pump AcrAB-TolC in *Enterobacter cloacae*. *Antimicrob. Agents Chemother.*  
592 <https://doi.org/10.1128/aac.01085-12>
- 593 R Development Core Team, R., 2011. R: A Language and Environment for Statistical Computing, R  
594 Foundation for Statistical Computing. <https://doi.org/10.1007/978-3-540-74686-7>
- 595 Riadi, G., Medina-Moenne, C., Holmes, D.S., 2012. TnpPred: A web service for the robust prediction  
596 of prokaryotic transposases. *Comp. Funct. Genomics*. <https://doi.org/10.1155/2012/678761>
- 597 Rodriguez-Mozaz, S., Chamorro, S., Marti, E., Huerta, B., Gros, M., Sánchez-Melsió, A., Borrego,  
598 C.M., Barceló, D., Balcázar, J.L., 2015. Occurrence of antibiotics and antibiotic resistance genes in  
599 hospital and urban wastewaters and their impact on the receiving river. *Water Res.* 69, 234–242.  
600 <https://doi.org/10.1016/j.watres.2014.11.021>
- 601 Sáenz, J.S., Marques, T.V., Barone, R.S.C., Cyrino, J.E.P., Kublik, S., Nesme, J., Schloter, M., Rath, S.,  
602 Vestergaard, G., 2019. Oral administration of antibiotics increased the potential mobility of  
603 bacterial resistance genes in the gut of the fish *Piaractus mesopotamicus*. *Microbiome*.  
604 <https://doi.org/10.1186/s40168-019-0632-7>
- 605 SCENIHR, 2009. Assessment of the Antibiotic Resistance Effects of Biocides, European Commission-  
606 Health & Consumer Protection DG. <https://doi.org/10.2772/8624>
- 607 Seier-Petersen, M.A., Nielsen, L.N., Ingmer, H., Aarestrup, F.M., Agersø, Y., 2015. Biocide  
608 Susceptibility of *Staphylococcus aureus* CC398 and CC30 Isolates from Pigs and Identification of  
609 the Biocide Resistance Genes, *qacG* and *qacC*. *Microb. Drug Resist.*  
610 <https://doi.org/10.1089/mdr.2014.0215>
- 611 Seiler, C., Berendonk, T.U., 2012. Heavy metal driven co-selection of antibiotic resistance in soil and  
612 water bodies impacted by agriculture and aquaculture 3, 1–10.

- 613 <https://doi.org/10.3389/fmicb.2012.00399>
- 614 Song, J., Rensing, C., Holm, P.E., Virta, M., Brandt, K.K., 2017. Comparison of Metals and  
615 Tetracycline as Selective Agents for Development of Tetracycline Resistant Bacterial Communities  
616 in Agricultural Soil. *Environ. Sci. Technol.* 51, 3040–3047.  
617 <https://doi.org/10.1021/acs.est.6b05342>
- 618 Stepanauskas, R., Glenn, T.C., Jagoe, C.H., Tuckfield, R.C., Lindell, A.H., King, C.J., McArthur, J. V.,  
619 2006. Coselection for microbial resistance to metals and antibiotics in freshwater microcosms.  
620 *Environ. Microbiol.* 8, 1510–1514. <https://doi.org/10.1111/j.1462-2920.2006.01091.x>
- 621 Stepanauskas, R., Glenn, T.C., Jagoe, C.H., Tuckfield, R.C., Lindell, A.H., McArthur, J. V., 2005.  
622 Elevated microbial tolerance to metals and antibiotics in metal-contaminated industrial  
623 environments. *Environ. Sci. Technol.* 39, 3671–3678. <https://doi.org/10.1021/es048468f>
- 624 Sun, J., Zhang, H., Liu, Y.H., Feng, Y., 2018. Towards Understanding MCR-like Colistin Resistance.  
625 *Trends Microbiol.* <https://doi.org/10.1016/j.tim.2018.02.006>
- 626 Tandukar, M., Oh, S., Tezel, U., Konstantinidis, K.T., Pavlostathis, S.G., 2013. Long-term exposure to  
627 benzalkonium chloride disinfectants results in change of microbial community structure and  
628 increased antimicrobial resistance. *Environ. Sci. Technol.* 47, 9730–9738.  
629 <https://doi.org/10.1021/es401507k>
- 630 Wang, H., Dong, Y., Yang, Y., Toor, G.S., Zhang, X., 2013. Changes in heavy metal contents in animal  
631 feeds and manures in an intensive animal production region of China. *J. Environ. Sci. (China)*.  
632 [https://doi.org/10.1016/S1001-0742\(13\)60473-8](https://doi.org/10.1016/S1001-0742(13)60473-8)
- 633 Warner, D.M., Levy, S.B., 2012. Soxs increases the expression of the zinc uptake system znuacb in an  
634 *Escherichia coli* murine pyelonephritis model. *J. Bacteriol.* <https://doi.org/10.1128/JB.05451-11>
- 635 Weatherspoon-Griffin, N., Yang, D., Kong, W., Hua, Z., Shi, Y., 2014. The CpxR/CpxA Two-  
636 component regulatory system up-regulates the multidrug resistance cascade to facilitate  
637 *Escherichia coli* resistance to a model antimicrobial peptide. *J. Biol. Chem.* 289, 32571–32582.

- 638 <https://doi.org/10.1074/jbc.M114.565762>
- 639 Xiao, L., Estellé, J., Küllerich, P., Ramayo-Caldas, Y., Xia, Z., Feng, Q., Liang, S., Pedersen, A.,  
640 Kjeldsen, N.J., Liu, C., Maguin, E., Doré, J., Pons, N., Le Chatelier, E., Prifti, E., Li, J., Jia, H., Liu,  
641 X., Xu, X., Ehrlich, S.D., Madsen, L., Kristiansen, K., Rogel-Gaillard, C., Wang, J., 2016. A  
642 reference gene catalogue of the pig gut microbiome. *Nat. Microbiol.* 1, 1–6.  
643 <https://doi.org/10.1038/nmicrobiol.2016.161>
- 644 Ye, J., Rensing, C., Su, J., Zhu, Y.G., 2017. From chemical mixtures to antibiotic resistance. *J. Environ.*  
645 *Sci. (China)* 62, 138–144. <https://doi.org/10.1016/j.jes.2017.09.003>
- 646 Zhu, Y.-G., Johnson, T.A., Su, J.-Q., Qiao, M., Guo, G.-X., Stedtfeld, R.D., Hashsham, S.A., Tiedje,  
647 J.M., 2013. Diverse and abundant antibiotic resistance genes in Chinese swine farms. *Proc. Natl.*  
648 *Acad. Sci.* 110, 3435–3440. <https://doi.org/10.1073/pnas.1222743110>
- 649 Zmantar, T., Kouidhi, B., Miladi, H., Bakhrouf, A., 2011. Detection of macrolide and disinfectant  
650 resistance genes in clinical *Staphylococcus aureus* and coagulase-negative staphylococci. *BMC Res.*  
651 *Notes.* <https://doi.org/10.1186/1756-0500-4-453>
- 652
